# Supplementary material
Source: Springer Nature journal article supplement (https://www.springermedizin.de/resource/supplementary/12874_2005_119_MOESM5_ESM.pdf/9433808)
Supplement: MOESM5 [file 9433808]

Unbiased five-  
category VAS

|     |   | v0 | v1 | v2 | v3 | v4 |           |  |
|-----|---|----|----|----|----|----|-----------|--|
| VRS | 4 |    |    |    |    |    | 0         |  |
|     | 3 |    |    | 1  | 5  |    | 6         |  |
|     | 2 |    | 3  | 9  |    |    | 12        |  |
|     | 1 |    | 10 | 2  | 1  |    | 13        |  |
|     | 0 |    |    |    |    |    | 0         |  |
|     |   | 0  | 13 | 12 | 6  | 0  | <b>31</b> |  |

a)

Equidistant five-  
category VAS

|     |   | v0 | v1 | v2 | v3 | v4 |           |  |
|-----|---|----|----|----|----|----|-----------|--|
| VRS | 4 |    |    |    |    |    | 0         |  |
|     | 3 |    | 1  |    | 5  |    | 6         |  |
|     | 2 | 1  | 10 | 1  |    |    | 12        |  |
|     | 1 | 9  | 3  | 1  |    |    | 13        |  |
|     | 0 |    |    |    |    |    | 0         |  |
|     |   | 10 | 14 | 2  | 5  | 0  | <b>31</b> |  |

b)
